# Supplementary material for: Intravitreal Aflibercept in Japanese Patients with Neovascular Glaucoma: The VEGA Randomized Clinical Trial
Source: PubMed Central journal article supplement — Adv Ther. 2020 Dec 16;38(2):1116–29. doi: 10.1007/s12325-020-01579-5 (PMC7889669; doi:10.1007/s12325-020-01579-5), 2020-12-16
Supplement: 12325_2020_1579_MOESM2_ESM.pdf [file 12325_2020_1579_MOESM2_ESM.pdf]

## List of IRB / 治験審査委員会一覧

Trial Description: BAY86-5321 NVG phase 3

Trial No: 17584

| No.   | 実施医療機関<br>Trial Center                                                                                  | 治験審査委員会の名称及び所在地<br>IRB Name and Address                                                                                                                                                                                         | 承認日<br>Date of<br>Approval | 委員長の氏名<br>Chairperson |
|-------|---------------------------------------------------------------------------------------------------------|---------------------------------------------------------------------------------------------------------------------------------------------------------------------------------------------------------------------------------|----------------------------|-----------------------|
| 20001 | 国立大学法人金沢大学附属病院<br>眼科<br><br>Kanazawa University Hospital<br>Department of Ophthalmology                 | 金沢大学附属病院受託研究審査委員会<br>石川県金沢市宝町 13-1<br><br>Kanazawa University Hospital<br>Institutional Review Board<br>13-1 Takaramachi, Kanazawa,<br>Ishikawa                                                                                 | 2015/3/12                  | 吉崎 智一                 |
| 20002 | 国立大学法人福井大学医学部附属病院<br>眼科<br><br>University of Fukui Hospital<br>Ophthalmology                            | 福井大学医学部附属病院治験審査委員会<br>福井県吉田郡永平寺町松岡下合月 23-3<br><br>University of Fukui Hospital<br>Institutional Review Board<br>23-3 Kamiaizuki Eiheiji-cho, Yoshida,<br>Fukui                                                                  | 2015/2/24                  | 腰地 孝昭                 |
| 20003 | 京都府立医科大学附属病院<br>眼科<br><br>University Hosp.,Kyoto Prefectural<br>University of Medicine<br>Ophthalmology | 京都府立医科大学附属病院治験審査委員会<br>京都府京都市上京区河原町通広小路<br>上る梶井町 465<br><br>University Hosp.,Kyoto Prefectural<br>University of Medicine<br>Institutional Review Board<br>465, Kajii-cho, Kawaramachidori<br>Hirokoji-agaru , Kamigyo-ku, Kyoto | 2015/3/20                  | 谷脇 雅史                 |

| No.   | 実施医療機関<br>Trial Center                                                                       | 治験審査委員会の名称及び所在地<br>IRB Name and Address                                                                                                             | 承認日<br>Date of<br>Approval | 委員長の氏名<br>Chairperson |
|-------|----------------------------------------------------------------------------------------------|-----------------------------------------------------------------------------------------------------------------------------------------------------|----------------------------|-----------------------|
| 20004 | 国立大学法人大阪大学医学部附属病院<br>眼科<br><br>Osaka University Hospital<br>Department of Ophthalmology      | 大阪大学医学部附属病院治験審査委員会<br>大阪府吹田市山田丘 2-15<br><br>Osaka University Hospital<br>Institutional Review Board<br>2-15, Yamadaoka, Suita, Osaka                | 2015/3/24                  | 松村 泰志                 |
| 20005 | 公立大学法人大阪市立大学医学部附属病院眼科<br><br>Osaka City University<br>HospitalDepartment of<br>Ophthalmology | 大阪市立大学医学部附属病院治験審査委員会大阪府大阪市阿倍野区旭町 1-5-7<br><br>Osaka City University<br>HospitalInstitutional Review<br>Board1-5-7, Asahi-cho, Abeno-ku,<br>Osaka    | 2015/2/26                  | 白木 邦彦                 |
| 20006 | 学校法人大阪医科薬科大学大阪医科大学附属病院<br>眼科<br><br>Osaka Medical College Hospital<br>Ophthalmology          | 大阪医科大学附属病院治験審査委員会<br>大阪府高槻市大学町 2-7<br><br>Osaka Medical College Hospital<br>Osaka Medical College Hospital IRB<br>2-7 Daigaku-cho, Takatsuki, Osaka | 2015/3/3                   | 米田 博                  |
| 20007 | 関西医科大学附属病院<br>眼科<br><br>Kansai Medical University<br>Hospital<br>Department of Ophthalmology | 関西医科大学附属枚方病院治験審査委員会<br>大阪府枚方市新町 2-3-1<br><br>Kansai Medical University Hospital<br>Institutional Review Board<br>2-3-1 Shinmachi, Hirakata, Osaka   | 2015/3/17                  | 日下 博文                 |

| No.   | 実施医療機関<br>Trial Center                                                                 | 治験審査委員会の名称及び所在地<br>IRB Name and Address                                                                                                                                      | 承認日<br>Date of<br>Approval | 委員長の氏名<br>Chairperson |
|-------|----------------------------------------------------------------------------------------|------------------------------------------------------------------------------------------------------------------------------------------------------------------------------|----------------------------|-----------------------|
| 20008 | 国立大学法人大分大学医学部附属病院<br>眼科<br><br>Oita University Hospital<br>Department of Ophthalmology | 大分大学医学部附属病院臨床研究<br>審査委員会<br>大分県由布市挾間町医大ヶ丘 1-1<br><br>Oita University Hospital<br>Institutional Review Board<br>1-1 Idaigaoka Hasamamachi, Yufu,<br>Oita                      | 2015/2/13                  | 白尾 國昭                 |
| 20009 | 杏林大学医学部付属病院<br>眼科<br><br>Kyorin University Hospital<br>Department of Ophthalmology     | 杏林大学医学部付属病院治験審査<br>委員会<br>東京都三鷹市新川 6-20-2<br><br>Kyorin University Hospital<br>Institutional Review Board<br>6-20-2 Shinkawa, Mitaka, Tokyo                                  | 2015/6/10                  | 楊 國昌                  |
| 20010 | 国立大学法人島根大学医学部附属病院眼科<br><br>Shimane University<br>Hospital Ophthalmology                | 島根大学医学部附属病院臨床研究<br>審査部会島根県出雲市塩冶町 89 番<br>1<br><br>Shimane University<br>Hospital Institutional Review<br>Board 89-1 Shioya-cho, Izumo,<br>Shimane                            | 2015/3/12                  | 直良 浩司                 |
| 20011 | 国立大学法人山口大学医学部附属病院<br>眼科<br><br>Yamaguchi University Hospital<br>Ophthalmology          | 山口大学医学部附属病院治験及び<br>人を対象とする医学系研究等倫理審<br>査委員会<br>山口県宇部市南小串 1-1-1<br><br>Yamaguchi University Hospital<br>Institutional Review Board<br>1-1-1, Minamikogushi, Ube,<br>Yamaguchi | 2015/4/15                  | 神田 隆                  |

| No.   | 実施医療機関<br>Trial Center                                                                                    | 治験審査委員会の名称及び所在地<br>IRB Name and Address                                                                                                                                 | 承認日<br>Date of<br>Approval | 委員長の氏名<br>Chairperson |
|-------|-----------------------------------------------------------------------------------------------------------|-------------------------------------------------------------------------------------------------------------------------------------------------------------------------|----------------------------|-----------------------|
| 20012 | 国立大学法人東北大学東北大学<br>病院<br>眼科<br><br>Tohoku University Hospital<br>Ophthalmology                             | 国立大学法人東北大学東北大学病<br>院治験審査委員会<br>宮城県仙台市青葉区星陵町 1-1<br><br>Tohoku University Hospital<br>Institutional Review Board<br>1-1 Seiryō-cho Aoba-ku, Sendai,<br>Miyagi            | 2015/5/25                  | 一ノ瀬 正和                |
| 20013 | 東京大学医学部附属病院<br>眼科・視覚矯正科<br><br>The University of Tokyo Hospital<br>Ophthalmology and Vision<br>Correction | 東京大学医学部附属病院臨床試験<br>審査委員会<br>東京都文京区本郷 7-3-1<br><br>The University of Tokyo Hospital<br>Institutional Review Board<br>7-3-1, Hongo, Bunkyo-ku, Tokyo                      | 2015/4/30                  | 佐藤 伸一                 |
| 20014 | 国立大学法人山梨大学医学部附<br>属病院<br>眼科<br><br>University of Yamanashi Hospital<br>Ophthalmology                      | 山梨大学医学部附属病院医薬品等<br>臨床研究審査委員会<br>山梨県中央市下河東 1110<br><br>University of Yamanashi Hospital<br>University of Yamanashi HP IRB<br>1110, Shimogato Higashi, Chuo,<br>Yamanashi | 2015/5/22                  | 増山 敬祐                 |
| 20015 | 国立大学法人岐阜大学医学部附<br>属病院眼科<br><br>Gifu University<br>Hospital Ophthalmology                                  | 岐阜大学医学部附属病院医薬品等<br>受託研究審査委員会岐阜県岐阜市<br>柳戸 1-1<br><br>Gifu University Hospital Institutional<br>Review Board 1-1 Yanagito, Gifu                                           | 2015/5/14                  | 森田 浩之                 |

| No.   | 実施医療機関<br>Trial Center                                                                         | 治験審査委員会の名称及び所在地<br>IRB Name and Address                                                                                                                                                       | 承認日<br>Date of<br>Approval | 委員長の氏名<br>Chairperson |
|-------|------------------------------------------------------------------------------------------------|-----------------------------------------------------------------------------------------------------------------------------------------------------------------------------------------------|----------------------------|-----------------------|
| 20016 | 聖マリアンナ医科大学病院<br>眼科<br>St. Marianna University of School<br>Medicine Hospital<br>Ophthalmology  | 聖マリアンナ医科大学附属病院等治<br>験審査委員会<br>神奈川県川崎市宮前区菅生 2-16-1<br>St. Marianna Univ. Group IRB<br>2-16-1 Sugao Miyamae-ku<br>, Kawasaki, Kanagawa                                                          | 2015/6/19                  | 舘田 武志                 |
| 20017 | 国立大学法人神戸大学医学部附<br>属病院<br>眼科<br>Kobe University Hospital<br>Department of Ophthalmology         | 神戸大学医学部附属病院医薬品及<br>び医療機器の臨床研究審査委員会<br>兵庫県神戸市中央区楠町 7-5-2<br>Kobe University Hospital<br>Institutional Review Board<br>7-5-2 Kusunoki-cho, Chuo-ku, Kobe,<br>Hyogo                              | 2015/5/27                  | 西村 善博                 |
| 20018 | 医療法人三栄会ツカザキ病院<br>眼科<br>Tsukazaki Hospital<br>Ophthalmology                                     | 医療法人社団中山内科リウマチアレ<br>ルギー科<br>兵庫県神戸市中央区東川崎町 1-7-4<br>Nakayama Internal medicine<br>Institutional Review Board<br>1-7-4 Higashikawasakicho Chuo-ku,<br>Kobe, Hyogo                               | 2015/4/17                  | 山口 延男                 |
| 20019 | 兵庫県立尼崎総合医療センター<br>眼科<br>Hyogo Prefectural Amagasaki<br>General Medical Center<br>Ophthalmology | 兵庫県立尼崎総合医療センター治<br>験・受託研究審査委員会<br>兵庫県尼崎市東灘波町 2-17-77<br>Hyogo Prefectural Amagasaki General<br>Medical Center<br>Institutional Review Board<br>2-17-77 Higashinaniwa-cho,<br>Amagasaki, Hyogo | 2015/11/9                  | 佐藤 幸人                 |
